# Supplementary material for: Attitudes towards Mandatory Occupational Vaccination and Intention to Get COVID-19 Vaccine during the First Pandemic Wave among Mongolian Healthcare Workers: A Cross-Sectional Survey
Source: MDPI journal article supplement (doi:10.3390/ijerph19010329), 2021-12-29
Supplement: s1 [file s1]

## Supplementary material

**Table S1. summary of the knowledge of recommended occupational vaccine by WHO (2019)**

| Variables                                                          | Total<br>(N=238) |      |
|--------------------------------------------------------------------|------------------|------|
|                                                                    | n                | %    |
| <b>Recommended vaccination for HCWs</b>                            | (Right answer)   |      |
| Diphtheria                                                         | 75               | 31.5 |
| Pertussis                                                          | 89               | 37.4 |
| Polio                                                              | 47               | 19.7 |
| Viral Hepatitis B                                                  | 211              | 88.7 |
| Influenza                                                          | 215              | 90.3 |
| BCG                                                                | 92               | 38.7 |
| Measles                                                            | 113              | 47.5 |
| Rubella                                                            | 84               | 35.3 |
| Varicella                                                          | 64               | 26.9 |
| Meningitis                                                         | 52               | 21.8 |
| HCWs- Healthcare workers,<br>BCG- Bacillus Calmette–Guérin vaccine |                  |      |

**Table S2. summary of the knowledge of recommended occupational vaccine by MoH**

| Variables                                                          | Total<br>(N=238) |      |
|--------------------------------------------------------------------|------------------|------|
|                                                                    | n                | %    |
| <b>Recommended vaccination for HCWs</b>                            | (Right answer)   |      |
| Diphtheria                                                         | 75               | 31.5 |
| Pertussis                                                          | 89               | 37.4 |
| Polio                                                              | 47               | 19.7 |
| Viral Hepatitis B                                                  | 211              | 88.7 |
| BCG                                                                | 92               | 38.7 |
| Influenza                                                          | 215              | 90.3 |
| Tetanus                                                            | 68               | 28.6 |
| HCWs- Healthcare workers,<br>BCG- Bacillus Calmette–Guérin vaccine |                  |      |
